# Supplementary material for: Cross-Sectional Association Between Employment Status and Self-Rated Health Among Middle-Aged Japanese Women: The Influence of Socioeconomic Conditions and Work-Life Conflict
Source: PubMed Central journal article supplement (PMC7429146; doi:10.2188/jea.je20190005), 2020-09-05
Supplement: je-30-396-s001.pdf [file je-30-396-s001.pdf]

|                                             |                                                                                                |
|---------------------------------------------|------------------------------------------------------------------------------------------------|
|                                             |                                                                                                |
| <b>eTable 1.</b> Work–Family Conflict score |                                                                                                |
| <b>Work-to-family conflict</b>              |                                                                                                |
| (i)                                         | ‘Your job reduces the amount of time you can spend with the family’                            |
| (ii)                                        | ‘Problems at work make you irritable at home’                                                  |
| (iii)                                       | ‘Your work involves a lot of travel away from home’                                            |
| (iv)                                        | ‘Your job takes so much energy you do not feel up to doing things that need attention at home’ |
| <b>Family-to-work conflict</b>              |                                                                                                |
| (v)                                         | ‘Family matters reduce the time you can devote to your job’                                    |
| (vi)                                        | ‘Family worries about problems distract you from your work’                                    |
| (vii)                                       | ‘Family activities stop you getting the amount of sleep you need to do your job well’          |

eTable 2. Adjusted ORs of employment type for poor self-rated health among Japanese middle-aged women

|                                                | n      | n of subjects<br>with poor<br>self-rated | Crude model          | Model 1 <sup>a</sup> | Model 2 <sup>b</sup> |
|------------------------------------------------|--------|------------------------------------------|----------------------|----------------------|----------------------|
|                                                |        |                                          | OR (95% CI)          | OR (95% CI)          | OR (95% CI)          |
| <b>Employment type</b>                         |        |                                          |                      |                      |                      |
| Regular employee                               | 8,708  | 1,643                                    | 1.00                 | 1.00                 | 1.00                 |
| Non-regular employee                           | 9,272  | 1,614                                    | 0.91 ( 0.84 , 0.98 ) | 0.90 ( 0.83 , 0.98 ) | 1.00 ( 0.92 , 1.09 ) |
| Self-employed                                  | 3,470  | 532                                      | 0.78 ( 0.70 , 0.87 ) | 0.84 ( 0.75 , 0.94 ) | 0.87 ( 0.78 , 0.98 ) |
| <b>Age category</b>                            |        |                                          |                      |                      |                      |
| 40-44                                          | 4,845  | 831                                      | 1.00                 | 1.00                 | 1.00                 |
| 45-49                                          | 4,701  | 890                                      | 1.17 ( 1.06 , 1.30 ) | 1.19 ( 1.08 , 1.32 ) | 1.19 ( 1.07 , 1.31 ) |
| 50-54                                          | 5,285  | 1,035                                    | 1.22 ( 1.11 , 1.35 ) | 1.19 ( 1.08 , 1.32 ) | 1.22 ( 1.10 , 1.35 ) |
| 55-59                                          | 5,611  | 1,035                                    | 0.95 ( 0.86 , 1.05 ) | 0.84 ( 0.76 , 0.94 ) | 0.90 ( 0.81 , 1.00 ) |
| <b>Education level</b>                         |        |                                          |                      |                      |                      |
| Junior High School graduates                   | 900    | 177                                      | 1.00                 | 1.00                 | 1.00                 |
| High School graduates                          | 10,938 | 2,002                                    | 0.92 ( 0.77 , 1.09 ) | 0.91 ( 0.77 , 1.09 ) | 0.89 ( 0.74 , 1.06 ) |
| Junior college graduates                       | 7,751  | 1,335                                    | 0.85 ( 0.71 , 1.01 ) | 0.82 ( 0.68 , 0.99 ) | 0.76 ( 0.63 , 0.92 ) |
| University graduates and higher                | 1,739  | 242                                      | 0.66 ( 0.53 , 0.82 ) | 0.61 ( 0.49 , 0.77 ) | 0.53 ( 0.42 , 0.67 ) |
| Others                                         | 87     | 24                                       | 1.56 ( 0.95 , 2.56 ) | 1.38 ( 0.83 , 2.30 ) | 1.39 ( 0.83 , 2.33 ) |
| Missing                                        | 35     | 9                                        | 1.41 ( 0.65 , 3.07 ) | 1.43 ( 0.65 , 3.13 ) | 1.36 ( 0.61 , 3.01 ) |
| <b>Household equivalent income</b>             |        |                                          |                      |                      |                      |
| Lowest 0                                       | 3,505  | 648                                      | 1.00                 | 1.00                 | 1.00                 |
| 1                                              | 4,590  | 866                                      | 1.03 ( 0.92 , 1.15 ) | 0.97 ( 0.86 , 1.09 ) | 1.02 ( 0.91 , 1.15 ) |
| 2                                              | 3,278  | 557                                      | 0.90 ( 0.80 , 1.02 ) | 0.90 ( 0.79 , 1.02 ) | 0.91 ( 0.80 , 1.04 ) |
| 3                                              | 4,319  | 744                                      | 0.92 ( 0.82 , 1.03 ) | 0.88 ( 0.78 , 1.00 ) | 0.93 ( 0.82 , 1.05 ) |
| Highest 4                                      | 4,460  | 725                                      | 0.86 ( 0.76 , 0.96 ) | 0.84 ( 0.74 , 0.95 ) | 0.88 ( 0.78 , 1.00 ) |
| Missing                                        | 1,298  | 249                                      | 1.05 ( 0.89 , 1.23 ) | 0.93 ( 0.79 , 1.11 ) | 1.12 ( 0.94 , 1.33 ) |
| <b>Occupation</b>                              |        |                                          |                      |                      |                      |
| Professionals & managers                       | 6,421  | 1,193                                    | 1.00                 | 1.00                 | 1.00                 |
| Clearical job                                  | 10,236 | 1,779                                    | 0.92 ( 0.85 , 1.00 ) | 0.89 ( 0.82 , 0.98 ) | 0.97 ( 0.88 , 1.06 ) |
| Manual job                                     | 4,793  | 817                                      | 0.90 ( 0.82 , 0.99 ) | 0.88 ( 0.78 , 0.98 ) | 0.97 ( 0.86 , 1.09 ) |
| <b>Marital status</b>                          |        |                                          |                      |                      |                      |
| Married                                        | 17,107 | 2,886                                    | 1.00                 | 1.00                 | 1.00                 |
| Non-married                                    | 4,272  | 887                                      | 1.29 ( 1.19 , 1.41 ) | 1.24 ( 1.13 , 1.35 ) | 1.30 ( 1.18 , 1.42 ) |
| Missing                                        | 71     | 16                                       | 1.43 ( 0.82 , 2.51 ) | 1.37 ( 0.78 , 2.42 ) | 1.26 ( 0.71 , 2.25 ) |
| <b>Hypertension</b>                            |        |                                          |                      |                      |                      |
| Yes                                            | 1,881  | 452                                      | 1.54 ( 1.38 , 1.72 ) | 1.40 ( 1.24 , 1.57 ) | 1.42 ( 1.26 , 1.60 ) |
| <b>Diabetes</b>                                |        |                                          |                      |                      |                      |
| Yes                                            | 448    | 131                                      | 1.96 ( 1.59 , 2.41 ) | 1.60 ( 1.29 , 1.98 ) | 1.52 ( 1.22 , 1.90 ) |
| <b>Hypercholesterolemia</b>                    |        |                                          |                      |                      |                      |
| Yes                                            | 2,089  | 485                                      | 1.47 ( 1.32 , 1.64 ) | 1.34 ( 1.19 , 1.50 ) | 1.34 ( 1.19 , 1.50 ) |
| <b>Medical history of diseases<sup>c</sup></b> |        |                                          |                      |                      |                      |
| Yes                                            | 4,631  | 1,203                                    | 1.93 ( 1.79 , 2.09 ) | 1.89 ( 1.75 , 2.05 ) | 1.79 ( 1.65 , 1.94 ) |
| <b>Work-Family conflict (0-2)</b>              |        |                                          |                      |                      |                      |
| 0                                              | 5,890  | 645                                      | 1.00                 |                      | 1.00                 |
| 1                                              | 9,212  | 1,432                                    | 1.50 ( 1.36 , 1.65 ) |                      | 1.50 ( 1.36 , 1.66 ) |
| 2                                              | 6,348  | 1,712                                    | 3.00 ( 2.72 , 3.32 ) |                      | 3.08 ( 2.78 , 3.41 ) |

<sup>a</sup>Model 1: Adjusted by the variables listed in the table with residential area.

<sup>b</sup>Model 2: Model1+Work-Family conflict.

<sup>c</sup>Diseases: heart disease, gout, asthma, COPD, chronic bronchitis, chronic kidney failure, cataracts, glaucoma, gastric polyp, colon polyp, gastric ulcer, duodenal ulcer, hepatitis/hepatic cirrhosis, gallstone, sleep apnea, or depression.

CI, confidence interval; OR, odds ratio.
